# Supplementary material for: Moderate consumption of fermented alcoholic beverages diminishes diet-induced non-alcoholic fatty liver disease through mechanisms involving hepatic adiponectin signaling in mice
Source: Springer Nature journal article supplement (doi:10.1007/s00394-019-01945-2), 2019-03-16
Supplement: MOESM1 [file 16553810]

# Moderate consumption of fermented alcoholic beverages diminishes diet-induced non-alcoholic fatty liver disease through mechanisms involving hepatic adiponectin signaling in mice

Finn Jung, Tino Lippmann, Annette Brandt, Cheng Jun Jin, Anna Janina Engstler, Anja Baumann\*

Article type: Original article

European Journal of Nutrition

\* **Corresponding author:** Anja Baumann, Ph.D.  
University of Vienna  
Department of Nutritional Sciences  
Molecular Nutritional Science  
Althanstraße 14 (UZA II)  
A-1090 Wien  
Email address: anja.baumann@univie.ac.at

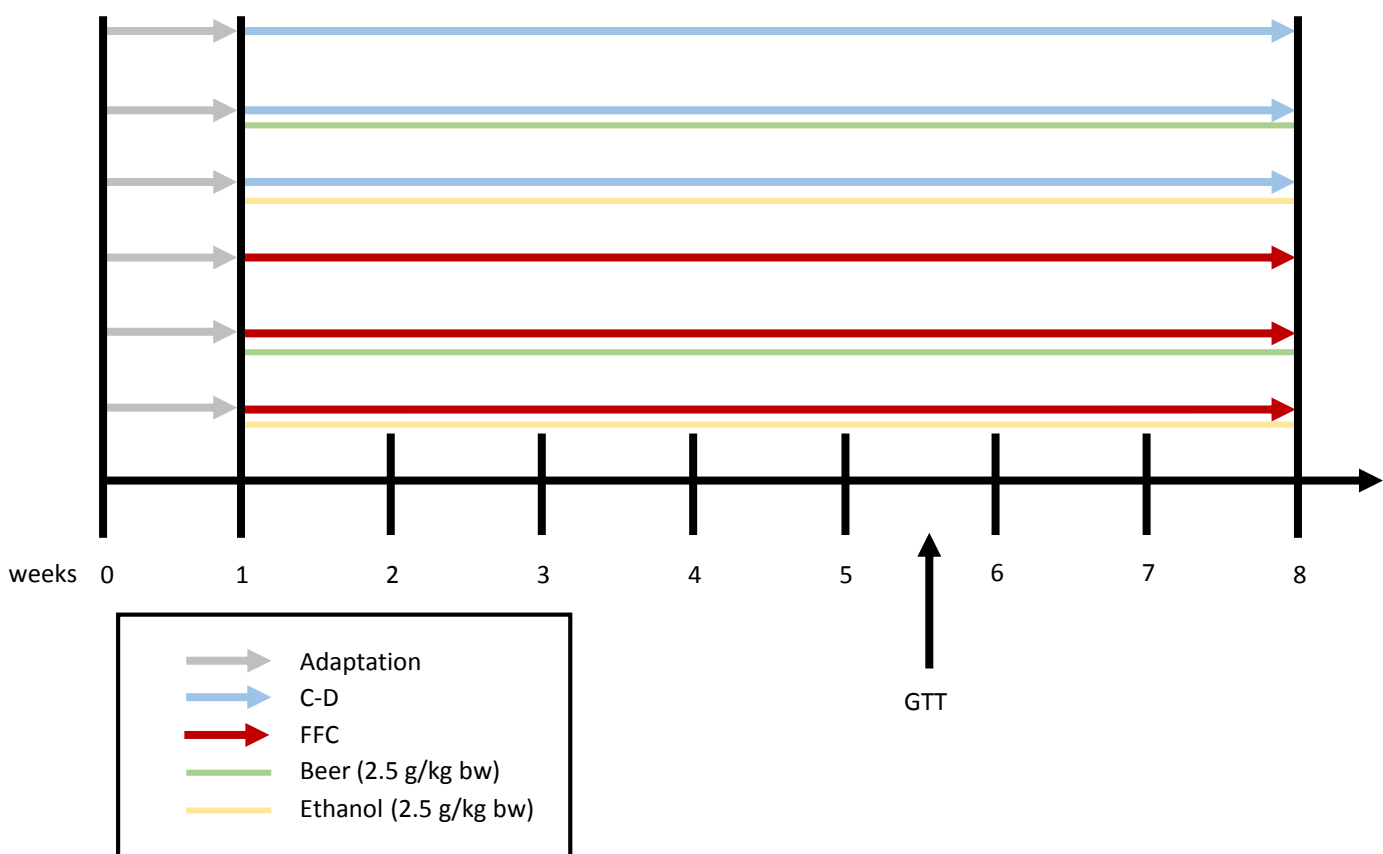

**Online Resource 1: Study design.** B, beer; C-D, control diet; E, ethanol; FFC, fructose-, fat-, cholesterol-rich diet; GTT, glucose tolerance test.
