# Supplementary material for: Moderate consumption of fermented alcoholic beverages diminishes diet-induced non-alcoholic fatty liver disease through mechanisms involving hepatic adiponectin signaling in mice
Source: Springer Nature journal article supplement (doi:10.1007/s00394-019-01945-2), 2019-03-16
Supplement: MOESM2 [file 16553810]

**Moderate consumption of fermented alcoholic beverages diminishes diet-induced non-alcoholic fatty liver disease through mechanisms involving hepatic adiponectin signaling in mice**

Finn Jung, Tino Lippmann, Annette Brandt, Cheng Jun Jin, Anna Janina Engstler, Anja Baumann<sup>\*</sup>

Article type: Original article

European Journal of Nutrition

**\* Corresponding author:** Anja Baumann, Ph.D.  
University of Vienna  
Department of Nutritional Sciences  
Molecular Nutritional Science  
Althanstraße 14 (UZA II)  
A-1090 Wien  
Email address: [anja.baumann@univie.ac.at](mailto:anja.baumann@univie.ac.at)

**Online Resource 2. Nutrient composition of diets.<sup>1</sup>**

|                                           |         | C-D   | FFC   |
|-------------------------------------------|---------|-------|-------|
| Crude protein, CP                         | % wt/wt | 17.4  | 16.0  |
| Crude fat, CL                             | % wt/wt | 5.1   | 11.8  |
| Crude fibre, CF                           | % wt/wt | 5.0   | 2.0   |
| Crude ash                                 | % wt/wt | 4.1   | 4.2   |
| Corn starch, pre-gelatinized              | % wt/wt | 34.6  | 5.0   |
| Sucrose                                   | % wt/wt | 11.0  | -     |
| Glucose                                   | % wt/wt | -     | 5.0   |
| Fructose                                  | % wt/wt | -     | 50.0  |
| Cholesterol                               | % wt/wt | -     | 0.16  |
| L-Lysine                                  | % wt/wt | 1.43  | 1.32  |
| L-Methionine + L-Cysteine                 | % wt/wt | 1.00  | 0.96  |
| L-Threonine                               | % wt/wt | 0.75  | 0.69  |
| Calcium                                   | % wt/wt | 0.78  | 0.77  |
| Phosphorus                                | % wt/wt | 0.48  | 0.47  |
| Sodium                                    | % wt/wt | 0.23  | 0.30  |
| Vitamin A (retinol acetate)               | IU/kg   | 15000 | 15000 |
| Vitamin D <sub>3</sub> (cholecalciferol)  | IU/kg   | 1500  | 1500  |
| Vitamin E ( $\alpha$ -tocopherol acetate) | mg/kg   | 150   | 150   |
| Fatty acids                               |         |       |       |
| 4:0                                       | % wt/wt | -     | 0.44  |
| 6:0                                       | % wt/wt | -     | 0.29  |
| 8:0                                       | % wt/wt | -     | 0.16  |
| 10:0                                      | % wt/wt | -     | 0.35  |
| 12:0                                      | % wt/wt | -     | 0.40  |
| 14:0                                      | % wt/wt | 0.02  | 1.23  |
| 16:0                                      | % wt/wt | 0.57  | 3.10  |
| 18:0                                      | % wt/wt | 0.18  | 1.14  |
| 18:1 (n-9)                                | % wt/wt | 1.28  | 2.58  |
| 18:2 (n-6)                                | % wt/wt | 2.65  | 0.21  |
| 18:3 (n-3)                                | % wt/wt | 0.29  | 0.06  |
| Metabolizable energy (ME)                 | MJ/kg   | 15.7  | 17.8  |
| CP                                        | kJ%     | 19    | 15    |
| CL                                        | kJ%     | 12    | 25    |
| Carbohydrate, CHO                         | kJ%     | 69    | 60    |

<sup>1</sup> Diet modified from WSD (TD88137) and respective control diet (Ssniff<sup>®</sup>, Germany). C-D, control diet; FFC, fructose-, fat-, cholesterol-rich diet.
