# Supplementary material for: Moderate consumption of fermented alcoholic beverages diminishes diet-induced non-alcoholic fatty liver disease through mechanisms involving hepatic adiponectin signaling in mice
Source: Springer Nature journal article supplement (doi:10.1007/s00394-019-01945-2), 2019-03-16
Supplement: MOESM3 [file 16553810]

**Moderate consumption of fermented alcoholic beverages diminishes diet-induced non-alcoholic fatty liver disease through mechanisms involving hepatic adiponectin signaling in mice**

Finn Jung, Tino Lippmann, Annette Brandt, Cheng Jun Jin, Anna Janina Engstler, Anja Baumann<sup>\*</sup>

Article type: Original article

European Journal of Nutrition

**\* Corresponding author:** Anja Baumann, Ph.D.  
University of Vienna  
Department of Nutritional Sciences  
Molecular Nutritional Science  
Althanstraße 14 (UZA II)  
A-1090 Wien  
Email address: [anja.baumann@univie.ac.at](mailto:anja.baumann@univie.ac.at)

### Online Resource 3. Primer sequences used for real-time RT-PCR.

| <b>Gene</b>                     | <b>Forward 5'---3'</b>    | <b>Reverse 5'---3'</b>    |
|---------------------------------|---------------------------|---------------------------|
| <i>18s</i>                      | ccatccaatcggtagtagcg      | gtaaccegtgaacccatt        |
| <i>Acox1</i>                    | gggaattggcatcgaga         | catctccgtctgggcgtagg      |
| <i>Adipoq</i>                   | gaagacctgcatctcctttctctcc | tcatgccgaagatgacgttactaca |
| <i>Adipor1</i>                  | gggacttggcttgagtggg       | gggaagaagcgtcaggaat       |
| <i>Adipor2</i>                  | tgccttaggtaggccaaca       | tccaaagtgcacgaccaga       |
| <i>Fas</i>                      | tctggccaacctcattggt       | gaagctgggggtccattgtg      |
| <i>Foxo1</i>                    | ctcccggtacttctctgctg      | gtggccagttggactggtt       |
| <i>Insr</i>                     | catcccgaagcgaagatcc       | gagtctgattgcatgcctgcag    |
| <i>Irs1</i>                     | gctctagtgttccgtgtcc       | gttcccaccctagacaaaa       |
| <i>Irs2</i>                     | gaagcggctaagtctcatgg      | gacgggtgggtgtagaggaaa     |
| <i>Ppar<math>\gamma</math>1</i> | aacgtgaagcccatcgagga      | ctgcacgtgctctgtgacga      |
| <i>Sirt1</i>                    | gacgctgtggcagattgta       | gaaatcccacaggagacaga      |
| <i>Srebp-1c</i>                 | accggctactgctggactgc      | agagcaagagggtgcatcg       |
